# Supplementary material for: Can Extensive Training Transform a Mouse into a Guinea Pig? An Evaluation Based on the Discriminative Abilities of Inferior Colliculus Neurons
Source: MDPI journal article supplement (doi:10.3390/biology13020092), 2024-02-02
Supplement: s1 [file s1]

**Table S1 (Original data of Figure 3)**

| Variable               | Mean value                                               | SEM                                                   | n (value)                                       | P**        | F (DFn. DFd)       | R square | Units        | Statistical test | Figure |
|------------------------|----------------------------------------------------------|-------------------------------------------------------|-------------------------------------------------|------------|--------------------|----------|--------------|------------------|--------|
| Firing rate all groups | Trained: 29.509<br>Exposed: 23.545<br>Guinea Pig: 23.379 | Trained: 2.566<br>Exposed: 1.578<br>Guinea Pig: 1.150 | Trained: 316<br>Exposed: 268<br>Guinea Pig: 390 | 0.0218*    | F (2. 971) = 3.843 | 0.007852 | Spike/second | ANOVA            | 3.A    |
| Corrcoeff all groups   | Trained: 0.458<br>Exposed: 0.396<br>Guinea Pig: 0.397    | Trained: 0.016<br>Exposed: 0.014<br>Guinea Pig: 0.012 | Trained: 303<br>Exposed: 264<br>Guinea Pig: 359 | 0.0009 *** | F (2. 923) = 7.082 | 0.01511  | none         | ANOVA            | 3.B    |
| MI all groups          | Trained: 1.204<br>Exposed: 1.106<br>Guinea Pig: 2.011    | Trained: 0.055<br>Exposed: 0.059<br>Guinea Pig: 0.031 | Trained: 74<br>Exposed: 59<br>Guinea Pig: 342   | 0.0061**   | F (2. 472) = 5.149 | 0.02135  | bit          | ANOVA            | 3.C    |

| Variable                            | Mean value                          | SEM                               | n (value)                       | P**      | T       | DF  | $\eta^2$<br>(eta squared) | Units        | Statistical test | Figure in which data are presented |
|-------------------------------------|-------------------------------------|-----------------------------------|---------------------------------|----------|---------|-----|---------------------------|--------------|------------------|------------------------------------|
| Firing rate Trained vs Exposed mice | Trained: 29.51<br>Exposed: 23.55    | Trained: 2.57<br>Exposed: 1.52    | Trained: 316<br>Exposed: 268    | 0.0519   | 1.948   | 582 | 0.006477                  | Spike/second | Unpaired T.test  | 3.A                                |
| Firing rate Trained VS guinea Pig   | Trained: 29.51<br>Guinea Pig: 23.38 | Trained: 2.57<br>Guinea Pig: 1.15 | Trained: 316<br>Guinea Pig: 389 | 0.0184 * | 2.363   | 704 | 0.007868                  | Spike/second | Unpaired T.test  | 3.A                                |
| Firing rate Exposed VS guinea Pig   | Exposed: 23.55<br>Guinea Pig: 23.38 | Exposed: 1.52<br>Guinea Pig: 1.15 | Exposed: 268<br>Guinea Pig: 389 | 0.9294   | 0.08862 | 656 | 1.197e-005                | Spike/second | Unpaired T.test  | 3.A                                |

| Variable                                   | Mean value                             | SEM                                    | n (value)                          | p**        | T       | DF  | $\eta^2$<br>(eta squared) | Units | Statistical test | Figure in which<br>data are<br>presented |
|--------------------------------------------|----------------------------------------|----------------------------------------|------------------------------------|------------|---------|-----|---------------------------|-------|------------------|------------------------------------------|
| Corrcoeff<br>Trained vs<br>Exposed<br>mice | Trained: 0.458<br><br>Exposed: 0.396   | Trained: 0.016<br><br>Exposed: 0.014   | Trained: 303<br><br>Exposed: 264   | 0.0033 **  | 2.950   | 565 | 0.01516                   | none  | Unpaired T.test  | 3.B                                      |
| Corrcoeff<br>Trained VS<br>guinea Pig      | Trained: 0.458<br><br>Guinea Pig:0.397 | Trained: 0.016<br><br>Guinea Pig:0.012 | Trained: 303<br><br>Guinea Pig:359 | 0.0008 *** | 3.355   | 660 | 0.01677                   | none  | Unpaired T.test  | 3.B                                      |
| Corrcoeff<br>Exposed<br>VS guinea<br>Pig   | Exposed: 0.396<br><br>Guinea Pig:0.397 | Exposed: 0.014<br><br>Guinea Pig:0.012 | Exposed: 264<br><br>Guinea Pig:359 | 0.9465     | 0.06712 | 621 | 7.255e-006                | none  | Unpaired T.test  | 3.B                                      |
| MI<br>Trained vs<br>Exposed<br>mice        | Trained: 1.204<br><br>Exposed: 1.106   | Trained: 0.055<br><br>Exposed: 0.059   | Trained: 74<br><br>Exposed: 59     | 0.2282     | 1.211   | 131 | 0.01106                   | bit   | Unpaired T.test  | 3.C                                      |
| MI<br>Trained VS<br>guinea Pig             | Trained: 1.204<br><br>Guinea Pig:1.011 | Trained: 0.055<br><br>Guinea Pig:0.031 | Trained: 74<br><br>Guinea Pig:342  | 0.0024 **  | 3.056   | 414 | 0.02207                   | bit   | Unpaired T.test  | 3.C                                      |
| MI<br>Exposed<br>VS guinea<br>Pig          | Exposed: 1.106<br><br>Guinea Pig:1.011 | Exposed: 0.059<br><br>Guinea Pig:0.031 | Exposed: 59<br><br>Guinea Pig:342  | 0.1719     | 1.369   | 399 | 0.004673                  | bit   | Unpaired T.test  | 3.C                                      |

**Table S2 (Original data of Figure 4A)**

| Variable                          | Mean value                                               | SEM                                                  | n (value)                                      | p**      | F (DFn. DFd)       | R square | Units        | Statistical test | Figure in which data are presented |
|-----------------------------------|----------------------------------------------------------|------------------------------------------------------|------------------------------------------------|----------|--------------------|----------|--------------|------------------|------------------------------------|
| Firing rate all groups<br>SNR +10 | Trained: 18.111<br>Exposed: 15.224<br>Guinea Pig:20.687  | Trained: 1.751<br>Exposed: 1.233<br>Guinea Pig:1.032 | Trained: 316<br>Exposed: 268<br>Guinea Pig:390 | 0.0166 * | F (2. 971) = 4.113 | 0.008401 | Spike/second | ANOVA            | 4.A                                |
| Firing rate all groups<br>SNR +0  | Trained: 15.335<br>Exposed: 13.808<br>Guinea Pig:17.306  | Trained: 1.699<br>Exposed: 1.261<br>Guinea Pig:0.947 | Trained: 316<br>Exposed: 268<br>Guinea Pig:390 | 0.1564   | F (2. 971) = 1.859 | 0.003815 | Spike/second | ANOVA            | 4.A                                |
| Firing rate all groups<br>SNR -10 | Trained: 16.773<br>Exposed: 12.422<br>Guinea Pig: 16.973 | Trained: 1.990<br>Exposed: 0.900<br>Guinea Pig:1.080 | Trained: 316<br>Exposed: 268<br>Guinea Pig:390 | 0.0466 * | F (2. 971) = 3.077 | 0.006297 | Spike/second | ANOVA            | 4.A                                |

| Variable                        | Mean value                           | SEM                                | n (value)                      | p**        | T     | DF  | $\eta^2$<br>(eta squared) | Units        | Statistical test | Figure in which data are presented |
|---------------------------------|--------------------------------------|------------------------------------|--------------------------------|------------|-------|-----|---------------------------|--------------|------------------|------------------------------------|
| Trained vs Exposed<br>SNR+10    | Trained: 18.111<br>Exposed: 15.224   | Trained: 1.751<br>Exposed: 1.233   | Trained: 316<br>Exposed: 268   | 0.1858     | 1.325 | 582 | 0.003006                  | Spike/second | Unpaired T.test  | 4.A                                |
| Trained VS guinea Pig<br>SNR+10 | Trained: 18.111<br>Guinea Pig:20.687 | Trained: 1.751<br>Guinea Pig:1.032 | Trained: 316<br>Guinea Pig:390 | 0.1806     | 1.340 | 704 | 0.002545                  | Spike/second | Unpaired T.test  | 4.A                                |
| Exposed VS guinea Pig<br>SNR+10 | Exposed: 15.224<br>Guinea Pig:20.687 | Exposed: 1.233<br>Guinea Pig:1.032 | Exposed: 268<br>Guinea Pig:390 | 0.0007 *** | 3.391 | 656 | 0.01723                   | Spike/second | Unpaired T.test  | 4.A                                |

| Variable                               | Mean value                            | SEM                                | n (value)                      | p**       | T       | DF  | $\eta^2$<br>(eta squared) | Units        | Statistical test | Figure in which<br>data are<br>presented |
|----------------------------------------|---------------------------------------|------------------------------------|--------------------------------|-----------|---------|-----|---------------------------|--------------|------------------|------------------------------------------|
| Trained vs<br>Exposed<br>SNR +0        | Trained: 15.335<br>Exposed: 13.808    | Trained: 1.699<br>Exposed: 1.261   | Trained: 316<br>Exposed: 268   | 0.4768    | 0.7119  | 582 | 0.0008700                 | Spike/second | Unpaired T.test  | 4.A                                      |
| Trained VS<br>guinea Pig<br>SNR +0     | Trained: 15.335<br>Guinea Pig:17.306  | Trained: 1.699<br>Guinea Pig:0.947 | Trained: 316<br>Guinea Pig:390 | 0.2811    | 1.079   | 704 | 0.001650                  | Spike/second | Unpaired T.test  | 4.A                                      |
| Exposed<br>VS guinea<br>Pig SNR +0     | Exposed: 13.808<br>Guinea Pig:17.306  | Exposed: 1.261<br>Guinea Pig:0.947 | Exposed: 268<br>Guinea Pig:390 | 0.0242 *  | 2.259   | 656 | 0.007718                  | Spike/second | Unpaired T.test  | 4.A                                      |
| Trained vs<br>Exposed<br>SNR -10       | Trained: 16.773<br>Exposed: 12.422    | Trained: 1.990<br>Exposed: 0.900   | Trained: 316<br>Exposed: 268   | 0.0556    | 1.918   | 582 | 0.006283                  | Spike/second | Unpaired T.test  | 4.A                                      |
| Trained VS<br>guinea Pig<br>SNR -10    | Trained: 16.773<br>Guinea Pig: 16.973 | Trained: 1.990<br>Guinea Pig:1.080 | Trained: 316<br>Guinea Pig:390 | 0.925     | 0.09414 | 704 | 1.259e-005                | Spike/second | Unpaired T.test  | 4.A                                      |
| Exposed<br>VS guinea<br>Pig<br>SNR -10 | Exposed: 12.422<br>Guinea Pig: 16.973 | Exposed: 0.900<br>Guinea Pig:1.080 | Exposed: 268<br>Guinea Pig:390 | 0.0025 ** | 3.030   | 656 | 0.01380                   | Spike/second | Unpaired T.test  | 4.A                                      |

**Table S3 (Original data of Figure 4B)**

| Variable                           | Mean value                                           | SEM                                                  | n (value)                                      | p**             | F (DFn. DFd)       | R square | Units | Statistical test | Figure in which data are presented |
|------------------------------------|------------------------------------------------------|------------------------------------------------------|------------------------------------------------|-----------------|--------------------|----------|-------|------------------|------------------------------------|
| Corrcoeff<br>all groups<br>SNR +10 | Trained: 0.289<br>Exposed: 0.253<br>Guinea Pig:0.369 | Trained: 0.017<br>Exposed: 0.015<br>Guinea Pig:0.012 | Trained: 293<br>Exposed: 259<br>Guinea Pig:338 | <0.0001<br>**** | F (2. 887) = 17.95 | 0.03889  | none  | ANOVA            | 4.B                                |
| Corrcoeff<br>all groups<br>SNR +0  | Trained: 0.217<br>Exposed: 0.183<br>Guinea Pig:0.263 | Trained: 0.016<br>Exposed: 0.015<br>Guinea Pig:0.010 | Trained: 275<br>Exposed: 258<br>Guinea Pig:342 | <0.0001<br>**** | F (2. 872) = 9.640 | 0.02163  | none  | ANOVA            | 4.B                                |
| Corrcoeff<br>all groups<br>SNR -10 | Trained: 0.108<br>Exposed: 0.076<br>Guinea Pig:0.121 | Trained: 0.011<br>Exposed: 0.009<br>Guinea Pig:0.006 | Trained: 275<br>Exposed: 259<br>Guinea Pig:344 | 0.0009 ***      | F (2. 875) = 7.047 | 0.01585  | none  | ANOVA            | 4.B                                |

| Variable                              | Mean value                         | SEM                                | n (value)                      | p**             | T     | DF  | $\eta^2$<br>(eta squared) | Units | Statistical test | Figure in which data are presented |
|---------------------------------------|------------------------------------|------------------------------------|--------------------------------|-----------------|-------|-----|---------------------------|-------|------------------|------------------------------------|
| Trained vs<br>Exposed<br>SNR+10       | Trained: 0.289<br>Exposed: 0.253   | Trained: 0.017<br>Exposed: 0.015   | Trained: 293<br>Exposed: 259   | 0.1153          | 1.577 | 550 | 0.004504                  | none  | Unpaired T.test  | 4.B                                |
| Trained VS<br>guinea Pig<br>SNR+10    | Trained: 0.289<br>Guinea Pig:0.369 | Trained: 0.017<br>Guinea Pig:0.012 | Trained: 293<br>Guinea Pig:338 | <0.0001<br>**** | 4.118 | 629 | 0.02625                   | none  | Unpaired T.test  | 4.B                                |
| Exposed<br>VS guinea<br>Pig<br>SNR+10 | Exposed: 0.253<br>Guinea Pig:0.369 | Exposed: 0.015<br>Guinea Pig:0.012 | Exposed: 259<br>Guinea Pig:338 | <0.0001<br>**** | 6.249 | 595 | 0.06159                   | none  | Unpaired T.test  | 4.B                                |

| Variable                               | Mean value                         | SEM                                | n (value)                      | p**             | T     | DF  | $\eta^2$<br>(eta squared) | Units | Statistical test | Figure in which<br>data are<br>presented |
|----------------------------------------|------------------------------------|------------------------------------|--------------------------------|-----------------|-------|-----|---------------------------|-------|------------------|------------------------------------------|
| Trained vs<br>Exposed<br>SNR +0        | Trained: 0.217<br>Exposed: 0.183   | Trained: 0.016<br>Exposed: 0.015   | Trained: 275<br>Exposed: 258   | 0.1125          | 1.590 | 531 | 0.004736                  | none  | Unpaired T.test  | 4.B                                      |
| Trained VS<br>guinea Pig<br>SNR +0     | Trained: 0.217<br>Guinea Pig:0.263 | Trained: 0.016<br>Guinea Pig:0.010 | Trained: 275<br>Guinea Pig:342 | 0.0097 **       | 2.594 | 615 | 0.01082                   | none  | Unpaired T.test  | 4.B                                      |
| Exposed<br>VS guinea<br>Pig SNR +0     | Exposed: 0.183<br>Guinea Pig:0.263 | Exposed: 0.015<br>Guinea Pig:0.010 | Exposed: 258<br>Guinea Pig:342 | <0.0001<br>**** | 4.685 | 598 | 0.03541                   | none  | Unpaired T.test  | 4.B                                      |
| Trained vs<br>Exposed<br>SNR -10       | Trained: 0.108<br>Exposed: 0.076   | Trained: 0.011<br>Exposed: 0.009   | Trained: 275<br>Exposed: 259   | 0.0226 *        | 2.286 | 532 | 0.009731                  | none  | Unpaired T.test  | 4.B                                      |
| Trained VS<br>guinea Pig<br>SNR -10    | Trained: 0.108<br>Guinea Pig:0.121 | Trained: 0.011<br>Guinea Pig:0.006 | Trained: 275<br>Guinea Pig:344 | 0.2952          | 1.048 | 617 | 0.001776                  | none  | Unpaired T.test  | 4.B                                      |
| Exposed<br>VS guinea<br>Pig<br>SNR -10 | Exposed: 0.076<br>Guinea Pig:0.121 | Exposed: 0.009<br>Guinea Pig:0.006 | Exposed: 259<br>Guinea Pig:344 | <0.0001<br>**** | 4.225 | 601 | 0.02885                   | none  | Unpaired T.test  | 4.B                                      |

**Table S4 (Original data of Figure 4C)**

| Variable                    | Mean value                                           | SEM                                                  | n (value)                                    | p**      | F (DFn. DFd)        | R square | Units | Statistical test | Figure in which data are presented |
|-----------------------------|------------------------------------------------------|------------------------------------------------------|----------------------------------------------|----------|---------------------|----------|-------|------------------|------------------------------------|
| MI<br>all groups<br>SNR +10 | Trained: 0.942<br>Exposed:0.817<br>Guinea Pig:1.018  | Trained: 0.069<br>Exposed: 0.065<br>Guinea Pig:0.034 | Trained: 56<br>Exposed: 48<br>Guinea Pig:389 | 0.0220 * | F (2. 409) = 3.850  | 0.01848  | bit   | ANOVA            | 4.C                                |
| MI<br>all groups<br>SNR +0  | Trained: 0.872<br>Exposed: 0.763<br>Guinea Pig:0.863 | Trained: 0.073<br>Exposed: 0.069<br>Guinea Pig:0.033 | Trained: 46<br>Exposed: 40<br>Guinea Pig:389 | 0.3946   | F (2. 358) = 0.9322 | 0.005181 | bit   | ANOVA            | 4.C                                |
| MI<br>all groups<br>SNR -10 | Trained: 0.757<br>Exposed: 0.692<br>Guinea Pig:0.621 | Trained: 0.089<br>Exposed: 0.068<br>Guinea Pig:0.027 | Trained: 28<br>Exposed: 25<br>Guinea Pig:389 | 0.1868   | F (2. 227) = 1.690  | 0.01467  | bit   | ANOVA            | 4.C                                |

| Variable                              | Mean value                         | SEM                                | n (value)                     | p**       | T     | DF  | $\eta^2$<br>(eta squared) | Units | Statistical test | Figure in which data are presented |
|---------------------------------------|------------------------------------|------------------------------------|-------------------------------|-----------|-------|-----|---------------------------|-------|------------------|------------------------------------|
| Trained vs<br>Exposed<br>SNR+10       | Trained: 0.942<br>Exposed:0.817    | Trained: 0.069<br>Exposed: 0.065   | Trained: 56<br>Exposed: 48    | 0.1983    | 1.295 | 102 | 0.01617                   | bit   | Unpaired T.test  | 4.C                                |
| Trained VS<br>guinea Pig<br>SNR+10    | Trained: 0.942<br>Guinea Pig:1.018 | Trained: 0.069<br>Guinea Pig:0.034 | Trained: 56<br>Guinea Pig:389 | 0.2811    | 1.080 | 362 | 0.003209                  | bit   | Unpaired T.test  | 4.C                                |
| Exposed<br>VS guinea<br>Pig<br>SNR+10 | Exposed:0.817<br>Guinea Pig:1.018  | Exposed: 0.065<br>Guinea Pig:0.034 | Exposed: 48<br>Guinea Pig:389 | 0.0069 ** | 2.717 | 354 | 0.02042                   | bit   | Unpaired T.test  | 4.C                                |

| Variable                               | Mean value                         | SEM                                | n (value)                     | p**     | T      | DF  | $\eta^2$<br>(eta squared) | Units | Statistical test | Figure in which<br>data are<br>presented |
|----------------------------------------|------------------------------------|------------------------------------|-------------------------------|---------|--------|-----|---------------------------|-------|------------------|------------------------------------------|
| Trained vs<br>Exposed<br>SNR +0        | Trained: 0.872<br>Exposed: 0.763   | Trained: 0.073<br>Exposed: 0.069   | Trained: 46<br>Exposed: 40    | 0.2865  | 1.073  | 84  | 0.01351                   | bit   | Unpaired T.test  | 4.C                                      |
| Trained VS<br>guinea Pig<br>SNR +0     | Trained: 0.872<br>Guinea Pig:0.863 | Trained: 0.073<br>Guinea Pig:0.033 | Trained: 46<br>Guinea Pig:389 | 0.9037  | 0.1211 | 319 | 4.598e-005                | bit   | Unpaired T.test  | 4.C                                      |
| Exposed<br>VS guinea<br>Pig SNR +0     | Exposed: 0.763<br>Guinea Pig:0.863 | Exposed: 0.069<br>Guinea Pig:0.033 | Exposed: 40<br>Guinea Pig:389 | 0.1765  | 1.355  | 313 | 0.005828                  | bit   | Unpaired T.test  | 4.C                                      |
| Trained vs<br>Exposed<br>SNR -10       | Trained: 0.757<br>Exposed: 0.692   | Trained: 0.089<br>Exposed: 0.068   | Trained: 28<br>Exposed: 25    | 0.5726  | 0.818  | 50  | 0.001586                  | bit   | Unpaired T.test  | 4.C                                      |
| Trained VS<br>guinea Pig<br>SNR -10    | Trained: 0.757<br>Guinea Pig:0.621 | Trained: 0.089<br>Guinea Pig:0.027 | Trained: 28<br>Guinea Pig:389 | 0.0318* | 1.632  | 203 | 0.01296                   | bit   | Unpaired T.test  | 4.C                                      |
| Exposed<br>VS guinea<br>Pig<br>SNR -10 | Exposed: 0.692<br>Guinea Pig:0.621 | Exposed: 0.068<br>Guinea Pig:0.027 | Exposed: 25<br>Guinea Pig:389 | 0.2429  | 1.171  | 201 | 0.006778                  | bit   | Unpaired T.test  | 4.C                                      |



**Table S5 (Original data of Figure 5A)**

| Variable                          | Mean value                                            | SEM                                                | n (value)                                    | p**      | F (DFn. DFd)       | R square | Units        | Statistical test | Figure in which data are presented |
|-----------------------------------|-------------------------------------------------------|----------------------------------------------------|----------------------------------------------|----------|--------------------|----------|--------------|------------------|------------------------------------|
| Firing rate all groups<br>SNR +10 | Trained:23.122<br>Exposed:13.279<br>Guinea Pig:20.010 | Trained:2.013<br>Exposed:1.401<br>Guinea Pig:1.030 | Trained:316<br>Exposed:268<br>Guinea Pig:390 | 0.163    | F (2. 971) = 1.817 | 0.003730 | Spike/second | ANOVA            | 5.A                                |
| Firing rate all groups<br>SNR +0  | Trained:25.076<br>Exposed:20.312<br>Guinea Pig:19.886 | Trained:2.116<br>Exposed:1.445<br>Guinea Pig:1.043 | Trained:316<br>Exposed:268<br>Guinea Pig:390 | 0.0293 * | F (2. 971) = 3.543 | 0.007245 | Spike/second | ANOVA            | 5.A                                |
| Firing rate all groups<br>SNR -10 | Trained:25.190<br>Exposed:20.154<br>Guinea Pig:24.871 | Trained:2.077<br>Exposed:1.301<br>Guinea Pig:1.295 | Trained:316<br>Exposed:268<br>Guinea Pig:390 | 0.0587   | F (2. 971) = 2.844 | 0.005825 | Spike/second | ANOVA            | 5.A                                |

| Variable                        | Mean value                          | SEM                               | n (value)                     | p**    | T      | DF  | $\eta^2$<br>(eta squared) | Units        | Statistical test | Figure in which data are presented |
|---------------------------------|-------------------------------------|-----------------------------------|-------------------------------|--------|--------|-----|---------------------------|--------------|------------------|------------------------------------|
| Trained vs Exposed<br>SNR+10    | Trained:23.122<br>Exposed:13.279    | Trained:2.013<br>Exposed:1.401    | Trained:316<br>Exposed:268    | 0.1238 | 1.541  | 582 | 0.004064                  | Spike/second | Unpaired T.test  | 5.A                                |
| Trained VS guinea Pig<br>SNR+10 | Trained:23.122<br>Guinea Pig:20.010 | Trained:2.013<br>Guinea Pig:1.030 | Trained:316<br>Guinea Pig:390 | 0.1399 | 1.478  | 704 | 0.003092                  | Spike/second | Unpaired T.test  | 5.A                                |
| Exposed VS guinea Pig<br>SNR+10 | Exposed:13.279<br>Guinea Pig:20.010 | Exposed:1.401<br>Guinea Pig:1.030 | Exposed:268<br>Guinea Pig:390 | 0.6678 | 0.4293 | 656 | 0.0002809                 | Spike/second | Unpaired T.test  | 5.A                                |

| Variable                               | Mean value                          | SEM                               | n (value)                     | p**      | T      | DF  | $\eta^2$<br>(eta squared) | Units        | Statistical test | Figure in which<br>data are<br>presented |
|----------------------------------------|-------------------------------------|-----------------------------------|-------------------------------|----------|--------|-----|---------------------------|--------------|------------------|------------------------------------------|
| Trained vs<br>Exposed<br>SNR +0        | Trained:25.076<br>Exposed:20.312    | Trained:2.116<br>Exposed:1.445    | Trained:316<br>Exposed:268    | 0.0685   | 1.825  | 582 | 0.005689                  | Spike/second | Unpaired T.test  | 5.A                                      |
| Trained VS<br>guinea Pig<br>SNR +0     | Trained:25.076<br>Guinea Pig:19.886 | Trained:2.116<br>Guinea Pig:1.043 | Trained:316<br>Guinea Pig:390 | 0.0182 * | 2.368  | 704 | 0.007899                  | Spike/second | Unpaired T.test  | 5.A                                      |
| Exposed<br>VS guinea<br>Pig SNR +0     | Exposed:20.312<br>Guinea Pig:19.886 | Exposed:1.445<br>Guinea Pig:1.043 | Exposed:268<br>Guinea Pig:390 | 0.8061   | 0.2455 | 656 | 9.190e-005                | Spike/second | Unpaired T.test  | 5.A                                      |
| Trained vs<br>Exposed<br>SNR -10       | Trained:25.190<br>Exposed:20.154    | Trained:2.077<br>Exposed:1.301    | Trained:316<br>Exposed:268    | 0.0453 * | 1.541  | 582 | 0.006869                  | Spike/second | Unpaired T.test  | 5.A                                      |
| Trained VS<br>guinea Pig<br>SNR -10    | Trained:25.190<br>Guinea Pig:24.871 | Trained:2.077<br>Guinea Pig:1.295 | Trained:316<br>Guinea Pig:390 | 0.8908   | 1.478  | 704 | 2.677e-005                | Spike/second | Unpaired T.test  | 5.A                                      |
| Exposed<br>VS guinea<br>Pig<br>SNR -10 | Exposed:20.154<br>Guinea Pig:24.871 | Exposed:1.301<br>Guinea Pig:1.295 | Exposed:268<br>Guinea Pig:390 | 0.0132 * | 0.4293 | 656 | 0.009326                  | Spike/second | Unpaired T.test  | 5.A                                      |

**Table S6 (Original data of Figure 5B)**

| Variable                           | Mean value                                         | SEM                                                | n (value)                                    | p**    | F (DFn. DFd)       | R square | Units | Statistical test | Figure in which data are presented |
|------------------------------------|----------------------------------------------------|----------------------------------------------------|----------------------------------------------|--------|--------------------|----------|-------|------------------|------------------------------------|
| Corrcoeff<br>all groups<br>SNR +10 | Trained:0.372<br>Exposed:0.332<br>Guinea Pig:0.363 | Trained:0.015<br>Exposed:0.014<br>Guinea Pig:0.012 | Trained:305<br>Exposed:264<br>Guinea Pig:348 | 0.0912 | F (2. 914) = 2.400 | 0.005225 | none  | ANOVA            | 5.B                                |
| Corrcoeff<br>all groups<br>SNR +0  | Trained:0.348<br>Exposed:0.318<br>Guinea Pig:0.321 | Trained:0.016<br>Exposed:0.014<br>Guinea Pig:0.012 | Trained:304<br>Exposed:266<br>Guinea Pig:351 | 0.2263 | F (2. 918) = 1.488 | 0.003232 | none  | ANOVA            | 5.B                                |
| Corrcoeff<br>all groups<br>SNR -10 | Trained:0.354<br>Exposed:0.324<br>Guinea Pig:0.313 | Trained:0.017<br>Exposed:0.016<br>Guinea Pig:0.011 | Trained:309<br>Exposed:261<br>Guinea Pig:365 | 0.0987 | F (2. 932) = 2.321 | 0.004957 | none  | ANOVA            | 5.B                                |

| Variable                              | Mean value                        | SEM                               | n (value)                     | p**      | T      | DF  | $\eta^2$<br>(eta squared) | Units | Statistical test | Figure in which data are presented |
|---------------------------------------|-----------------------------------|-----------------------------------|-------------------------------|----------|--------|-----|---------------------------|-------|------------------|------------------------------------|
| Trained vs<br>Exposed<br>SNR+10       | Trained:0.372<br>Exposed:0.332    | Trained:0.015<br>Exposed:0.014    | Trained:305<br>Exposed:264    | 0.0477 * | 1.984  | 567 | 0.006898                  | none  | Unpaired T.test  | 5.B                                |
| Trained VS<br>guinea Pig<br>SNR+10    | Trained:0.372<br>Guinea Pig:0.363 | Trained:0.015<br>Guinea Pig:0.012 | Trained:305<br>Guinea Pig:348 | 0.6283   | 0.4843 | 651 | 0.0003602                 | none  | Unpaired T.test  | 5.B                                |
| Exposed<br>VS guinea<br>Pig<br>SNR+10 | Exposed:0.332<br>Guinea Pig:0.363 | Exposed:0.014<br>Guinea Pig:0.012 | Exposed:264<br>Guinea Pig:348 | 0.0689   | 1.822  | 610 | 0.005415                  | none  | Unpaired T.test  | 5.B                                |

| Variable                               | Mean value                        | SEM                               | n (value)                     | P**      | T      | DF  | $\eta^2$<br>(eta squared) | Units | Statistical test | Figure in which<br>data are<br>presented |
|----------------------------------------|-----------------------------------|-----------------------------------|-------------------------------|----------|--------|-----|---------------------------|-------|------------------|------------------------------------------|
| Trained vs<br>Exposed<br>SNR +0        | Trained:0.348<br>Exposed:0.318    | Trained:0.016<br>Exposed:0.014    | Trained:304<br>Exposed:266    | 0.1512   | 1.437  | 568 | 0.003624                  | none  | Unpaired T.test  | 5.B                                      |
| Trained VS<br>guinea Pig<br>SNR +0     | Trained:0.348<br>Guinea Pig:0.321 | Trained:0.016<br>Guinea Pig:0.012 | Trained:304<br>Guinea Pig:351 | 0.1483   | 1.447  | 653 | 0.003197                  | none  | Unpaired T.test  | 5.B                                      |
| Exposed<br>VS guinea<br>Pig SNR +0     | Exposed:0.318<br>Guinea Pig:0.321 | Exposed:0.014<br>Guinea Pig:0.012 | Exposed:266<br>Guinea Pig:351 | 0.8603   | 0.1761 | 615 | 5.041e-005                | none  | Unpaired T.test  | 5.B                                      |
| Trained vs<br>Exposed<br>SNR -10       | Trained:0.354<br>Exposed:0.324    | Trained:0.017<br>Exposed:0.016    | Trained:309<br>Exposed:261    | 0.1876   | 1.319  | 568 | 0.003055                  | none  | Unpaired T.test  | 5.B                                      |
| Trained VS<br>guinea Pig<br>SNR -10    | Trained:0.354<br>Guinea Pig:0.313 | Trained:0.017<br>Guinea Pig:0.011 | Trained:309<br>Guinea Pig:365 | 0.0339 * | 2.126  | 672 | 0.006682                  | none  | Unpaired T.test  | 5.B                                      |
| Exposed<br>VS guinea<br>Pig<br>SNR -10 | Exposed:0.324<br>Guinea Pig:0.313 | Exposed:0.016<br>Guinea Pig:0.011 | Exposed:261<br>Guinea Pig:365 | 0.5718   | 0.5658 | 624 | 0.0005127                 | none  | Unpaired T.test  | 5.B                                      |

**Table S7 (Original data of Figure 5C)**

| Variable                    | Mean value                                         | SEM                                                | n (value)                                  | p**             | F (DFn. DFd)       | R square | Units | Statistical test | Figure in which data are presented |
|-----------------------------|----------------------------------------------------|----------------------------------------------------|--------------------------------------------|-----------------|--------------------|----------|-------|------------------|------------------------------------|
| MI<br>all groups<br>SNR +10 | Trained:1.036<br>Exposed:0.843<br>Guinea Pig:1.041 | Trained:0.061<br>Exposed:0.056<br>Guinea Pig:0.035 | Trained:67<br>Exposed:53<br>Guinea Pig:389 | 0.0255 *        | F (2. 429) = 3.700 | 0.01696  | bit   | ANOVA            | 5.C                                |
| MI<br>all groups<br>SNR +0  | Trained:0.932<br>Exposed:0.775<br>Guinea Pig:1.052 | Trained:0.066<br>Exposed:0.058<br>Guinea Pig:0.038 | Trained:58<br>Exposed:46<br>Guinea Pig:389 | 0.0017 **       | F (2. 388) = 6.467 | 0.03226  | bit   | ANOVA            | 5.C                                |
| MI<br>all groups<br>SNR -10 | Trained:0.813<br>Exposed:0.654<br>Guinea Pig:1.079 | Trained:0.058<br>Exposed:0.048<br>Guinea Pig:0.038 | Trained:50<br>Exposed:40<br>Guinea Pig:389 | <0.0001<br>**** | F (2. 379) = 17.51 | 0.08459  | bit   | ANOVA            | 5.C                                |

| Variable                              | Mean value                        | SEM                               | n (value)                    | p**       | T       | DF  | $\eta^2$<br>(eta squared) | Units | Statistical test | Figure in which data are presented |
|---------------------------------------|-----------------------------------|-----------------------------------|------------------------------|-----------|---------|-----|---------------------------|-------|------------------|------------------------------------|
| Trained vs<br>Exposed<br>SNR+10       | Trained:1.036<br>Exposed:0.843    | Trained:0.061<br>Exposed:0.056    | Trained:67<br>Exposed:53     | 0.0243 *  | 2.282   | 118 | 0.04227                   | bit   | Unpaired T.test  | 5.C                                |
| Trained VS<br>guinea Pig<br>SNR+10    | Trained:1.036<br>Guinea Pig:1.041 | Trained:0.061<br>Guinea Pig:0.035 | Trained:67<br>Guinea Pig:389 | 0.94      | 0.07527 | 377 | 1.503e-005                | bit   | Unpaired T.test  | 5.C                                |
| Exposed<br>VS guinea<br>Pig<br>SNR+10 | Exposed:0.843<br>Guinea Pig:1.041 | Exposed:0.056<br>Guinea Pig:0.035 | Exposed:53<br>Guinea Pig:389 | 0.0073 ** | 2.698   | 363 | 0.01967                   | bit   | Unpaired T.test  | 5.C                                |

| Variable                               | Mean value                        | SEM                               | n (value)                    | P**             | T     | DF  | $\eta^2$<br>(eta squared) | Units | Statistical test | Figure in which<br>data are<br>presented |
|----------------------------------------|-----------------------------------|-----------------------------------|------------------------------|-----------------|-------|-----|---------------------------|-------|------------------|------------------------------------------|
| Trained vs<br>Exposed<br>SNR +0        | Trained:0.932<br>Exposed:0.775    | Trained:0.066<br>Exposed:0.058    | Trained:58<br>Exposed:46     | 0.087           | 1.728 | 102 | 0.02845                   | bit   | Unpaired T.test  | 5.C                                      |
| Trained VS<br>guinea Pig<br>SNR +0     | Trained:0.932<br>Guinea Pig:1.052 | Trained:0.066<br>Guinea Pig:0.038 | Trained:58<br>Guinea Pig:389 | 0.1117          | 1.595 | 343 | 0.007358                  | bit   | Unpaired T.test  | 5.C                                      |
| Exposed<br>VS guinea<br>Pig SNR +0     | Exposed:0.775<br>Guinea Pig:1.052 | Exposed:0.058<br>Guinea Pig:0.038 | Exposed:46<br>Guinea Pig:389 | 0.0007 ***      | 3.407 | 331 | 0.03388                   | bit   | Unpaired T.test  | 5.C                                      |
| Trained vs<br>Exposed<br>SNR -10       | Trained:0.813<br>Exposed:0.654    | Trained:0.058<br>Exposed:0.048    | Trained:50<br>Exposed:40     | 0.0434 *        | 2.050 | 88  | 0.04557                   | bit   | Unpaired T.test  | 5.C                                      |
| Trained VS<br>guinea Pig<br>SNR -10    | Trained:0.813<br>Guinea Pig:1.079 | Trained:0.058<br>Guinea Pig:0.038 | Trained:50<br>Guinea Pig:389 | 0.0007 ***      | 3.442 | 340 | 0.03367                   | bit   | Unpaired T.test  | 5.C                                      |
| Exposed<br>VS guinea<br>Pig<br>SNR -10 | Exposed:0.654<br>Guinea Pig:1.079 | Exposed:0.048<br>Guinea Pig:0.038 | Exposed:40<br>Guinea Pig:389 | <0.0001<br>**** | 5.043 | 330 | 0.07156                   | bit   | Unpaired T.test  | 5.C                                      |
